# Supplementary material for: Reactivity among first and second coordination spheres using a multiprotonated ligand and Cu(ii) in the solid-state
Source: Royal Society of Chemistry journal article supplement (doi:10.1039/c9ce00783k), 2019-01-01
Supplement: c9ce00783k1.pdf [file c9ce00783k1.pdf]

# Supporting Information: Reactivity among first and second coordination spheres using a multiprotonated ligand and Cu(II) in the solid-state.

*Haitao Li<sup>[a]</sup>, Yuxia Yang<sup>[a]</sup>, Antonino Famulari<sup>[b]</sup>, Lianxin Xin<sup>[a]</sup>, Javier Marti-Rujas,<sup>\*,[b,c]</sup> Fang Guo<sup>\*,[a]</sup>*

<sup>a</sup>College of Chemistry, Liaoning University, Shenyang 110036, China.

<sup>b</sup>Dipartimento di Chimica Materiali e Ingegneria Chimica. “Giulio Natta”, Politecnico di Milano, Via L. Mancinelli 7, 20131 Milan, Italy.

<sup>c</sup>Center for Nano Science and Technology@Polimi, Istituto Italiano di Tecnologia, Via Pascoli 70/3, 20133 Milano, Italy.

## Contents

### Materials and Methods

Synthesis of ligand (1R,2R)-N,N'-bis(pyridine-3-ylmethyl)cyclohexane-1,2-diamine (L)

Synthesis of  $[\text{H}_4\text{L}]^{4+} \cdot 4\text{Cl}^- \cdot (\text{H}_2\text{O})$  (1)

Synthesis of  $[\text{H}_4\text{L}]^{4+} \cdot [\text{CuCl}_4]^{2-} \cdot 2\text{Cl}^-$  (2)

Synthesis of  $[\text{H}_4\text{L}]^{4+} \cdot [\text{CuCl}_3(\text{H}_2\text{O})]^- \cdot 3\text{Cl}^-$  (3)

Mechanochemical synthesis of  $[\text{H}_4\text{L}]^{4+} \cdot [\text{CuCl}_3(\text{H}_2\text{O})]^- \cdot 3\text{Cl}^-$  (3)

## Dehydrochlorination reaction (3→4). Synthesis of [LCuCl<sub>2</sub>] (4)

**Chemisorption of HCl and H<sub>2</sub>O Vapours. First-to-second coordination sphere reaction 4→3.**

**Flux synthesis of complex 4**

**Low-Pressure Nitrogen Adsorption/Desorption Measurements**

**Figure S1.** Images of the single crystals of compounds **1**, **2**, **3**, and **4**.

**Figure S2.** Packing of **1** viewed along the *a*-axis. Color code: carbon: orange; nitrogen: blue; oxygen: red; chloride: green; hydrogen: white.

**Figure S3.** Packing of **2** viewed along the *c*-axis. Color code: carbon: orange; nitrogen: blue; chloride: green; copper: brown; hydrogen: white.

**Figure S4.** Packing of **3** viewed along the *a*-axis. Color code: carbon: orange; nitrogen: blue; oxygen: red; chloride: green; copper: brown; hydrogen: white.

**Figure S5.** Coordination geometries around the [CuCl<sub>4</sub>]<sup>2-</sup> metal center in **2** (a). The disordered atoms in the [CuCl<sub>4</sub>]<sup>2-</sup> have not been shown for clarity purposes. View of the [CuCl<sub>3</sub>(H<sub>2</sub>O)]<sup>-</sup> in **3**: top (b) and side views (c).

**Figure S6.** Crystal structure of **4** showing the hydrogen bond and short contacts along the *a*-axis. Color code: carbon: orange; nitrogen: blue; oxygen: red; chloride: green; copper: brown; hydrogen: white.

**Figure S7.** Packing of **4** viewed along the *a*-axis. Color code: carbon: orange; nitrogen: blue; oxygen: red; chloride: green; copper: brown; hydrogen: white.

**Table S1.** Hydrogen bonds in crystal **2**.

**Table S2.** Hydrogen bonds in crystal **3**.

**Table S3.** Hydrogen bond and short interactions in crystal **4**.

**Figure S8.** TGA corresponding to second sphere adducts **2** and **3**.

**Figure S9.** DSC corresponding to second sphere adduct **3**.

**Figure S10.** DSC corresponding to the coordination complex **4**.

**Figure S11.** Nitrogen adsorption/desorption isotherms of the powder of **3** (a) and **4** (b).

**Figure S12.** (a) Simulated XRPD from single crystal **1**. (b) The product of grinding salt of **L** and  $\text{CuCl}_2 \cdot 2\text{H}_2\text{O}$  in 1:1 ratio with a drop of concentrated HCl and a drop of methanol for 5 minutes. (c) Simulated XRPD from single crystal **3**.

**Figure S13.** Experimental XRPD patterns of **1**: (a) Simulated XRPD from single crystal **1**; (b) Experimental XRPD from single crystal **1**.

**Figure S14.** Experimental XRPD patterns of crystal **2**: (a) Simulated XRPD from single crystal **2**; (b) Experimental XRPD from single crystal **2**.

**Figure S15.** Experimental XRPD patterns of crystal **3**: (a) Simulated XRPD from single crystal **3**; (b) Experimental XRPD from single crystal **3**.

**Figure S16.** Experimental XRPD patterns of crystal **4**: (a) Simulated XRPD from single crystal **4**; (b) Experimental XRPD from single crystal **4**.

**Table S5.** Crystal data and structural refinement parameters for **1–4**.

**Table S6** DFT energies relating to the reaction  $[\text{CuCl}_4]^{2-} + \text{H}_2\text{O} \rightarrow [\text{CuCl}_3\text{H}_2\text{O}]^- + \text{Cl}^-$ . Total energies are reported in hartree while differences both in hartree and kcal/mol.

**Table S7** Solid state DFT energies relating to crystalline structures **2** and **3**. Total energies are reported in hartree while differences both in hartree and kcal/mol.

## **Molecular Modelling Data**

## Materials and Methods

All chemicals were obtained from commercial sources and used without further purification. Powder X-ray diffraction measurements were performed with a Bruker D8 diffractometer ( $\lambda = 1.54056 \text{ \AA}$ ). TGA data were obtained using a TGA/SDTA851e thermogravimetric analyzer with a scan rate of  $10^\circ\text{C min}^{-1}$ . DSC experiments were performed using METTLER DSC1/700 at a heating rate of  $10^\circ\text{C min}^{-1}$  in a stream of  $\text{N}_2$  gas over a temperature range of  $25^\circ\text{C}$ – $250^\circ\text{C}$ .

### Single crystal X-ray diffraction data.

Single crystal X-ray diffraction experiments were carried out using a Bruker D8 QUEST X-ray single crystal diffractometer. For the data collection, *omega* and *phi* scans were employed. The frames were integrated with the Bruker SAINT software package using a narrow-frame algorithm. The single crystal X-ray data were corrected for absorption effects using the Multi-Scan method (SADABS).

The structures were determined using direct methods and refined using (based on  $F^2$  using all independent data (SHELXTL 97)) using the Bruker SHELXTL<sup>1,2</sup> Software Package. All non-hydrogen atoms were located from different Fourier maps and refined with anisotropic displacement parameters. Hydrogen atoms were added in riding positions.

### Synthesis of ligand (1R,2R)-N,N'-bis(pyridine-3-ylmethyl)cyclohexane-1,2-diamine (L)

(1R, 2R)-1, 2-diaminocyclohexane (2.54 g, 21 mmol) was dissolved in 30 ml methanol, and 3-pyridinecarboxaldehyde (4.50 g, 42 mmol) was slowly added. The reaction mixture was stirred for 6h at  $60^\circ\text{C}$ , and then cooled down to room temperature. Sodium

borohydride was added (1.8 g, 47.6 mmol) to the solution. Following a further 12h reaction time, the solvent was removed by rotary evaporation and 20 mL water was added to quench the excess sodium borohydride. The aqueous phase was extracted with DCM (3 ×15 ml) then combined methylene chloride layer was washed with water (2×20 mL). The separated organics were dried over sodium sulfate, filtered and the solvent evaporated to give the product **L** (5.84 g, 92.9 %).<sup>3</sup>

### **Synthesis of $[\text{H}_4\text{L}]^{4+}\cdot 4\text{Cl}^-\cdot (\text{H}_2\text{O})$ (**1**)**

30 mg (0.10 mmol) of **L** was dissolved by 5mL methanol and 5mL acetonitrile then 0.05mL concentrated hydrochloric acid was added. The flask was allowed to stand to evaporate for one week at r. t., giving rise to colorless transparent crystals **1**, m.p. 234.5-235.6 °C.

### **Synthesis of $[\text{H}_4\text{L}]^{4+}\cdot [\text{CuCl}_4]^{2-}\cdot 2\text{Cl}^-$ (**2**)**

46 mg (0.1 mmol) of protonated **L** was dissolved by methanol and ethanol mixed solvents (10 mL, 1:1) in a 25 mL Erlenmeyer flask, and then concentrated HCl (0.1 mL) and  $\text{CuCl}_2\cdot 2\text{H}_2\text{O}$  (17 mg, 0.10 mmol) were added slowly to the flask, which was shaken until the contents has dissolved and allowing the solvents to slowly evaporate. Crystals grew in 3 days, giving rise to yellow needle crystals **2**, m.p. 169.8-171.2 °C.

### **Synthesis of $[\text{H}_4\text{L}]^{4+}\cdot [\text{CuCl}_3(\text{H}_2\text{O})]^- \cdot 3\text{Cl}^-$ (**3**)**

46 mg (0.10 mmol) of protonated **L** was dissolved by methanol (10 mL) in a 25 mL Erlenmeyer flask, and then concentrated HCl (0.10 mL) and  $\text{CuCl}_2\cdot 2\text{H}_2\text{O}$  (17 mg, 0.10 mmol) were added slowly to the flask, which was shaken until the contents has dissolved, and allowing the solvents to slowly evaporate. Crystals grew in 10 days, giving rise to green needle crystals **3**. m.p. 168.7-170.1 °C.

### **Mechanochemical synthesis of $[\text{H}_4\text{L}]^{4+}\cdot [\text{CuCl}_3(\text{H}_2\text{O})]^- \cdot 3\text{Cl}^-$ (**3**)**

$\text{CuCl}_2\cdot 2\text{H}_2\text{O}$  (17 mg, 0.10 mmol) and 46 mg (0.10 mmol) of protonated **L** were ground

together for 5 min in an agate mortar with a drop of concentrated HCl. The resulting powder material was dried at 40 °C to remove any traces of water.

### **Dehydrochlorination reaction (3→4). Synthesis of [LCuCl<sub>2</sub>] (4)**

Salt **3** (58 mg, 0.10 mmol) and KOH (22.6 mg, 0.40 mmol) were ground together for 8 min in an agate mortar with a drop of methanol. The resulting light blue powder was dried under vacuum for a few minutes. The powder was dissolved by methanol and acetonitrile mixed solvents, 2 days later, giving rise to blue crystal **4**, m.p. 193.2-194.1 °C.

### **Chemisorption of HCl and H<sub>2</sub>O Vapours. First-to-second coordination sphere reaction 4→3.**

Micro-crystalline complex **4** (43 mg, 0.10 mmol) was placed in a vial inside a sealed jar containing concentrated HCl. The blue powder became green in 48 h.

### **Flux synthesis of complex 4**

(1*R*, 2*R*)-*N*, *N'*-bis(pyridin-3-ylmethyl)cyclohexane-1,2-diamine (**L**) (59.6 mg, 0.2 mmol) and CuCl<sub>2</sub>·2H<sub>2</sub>O (34 mg, 0.2 mmol) were dissolved in 20 mL and 8 mL methanol, respectively. Then, the solution of CuCl<sub>2</sub>·2H<sub>2</sub>O was slowly added. The reaction mixture was stirred for one hour at 60°C, then cooled down to room temperature, and obtained blue precipitate of complex **4**.

### **Low-Pressure Nitrogen Adsorption/Desorption Measurements**

Low pressure gas adsorption/desorption studies were conducted on a automated volumetric adsorption analyzers ASIQ-C (Quantachrome Instruments) at relative pressures up to 1 atm. The cryogenic temperature was controlled using liquid nitrogen baths at 77 K. The apparent surface areas were determined from the nitrogen adsorption/desorption isotherms collected at 77 K by applying the Brunauer-Emmett-Teller (BET).

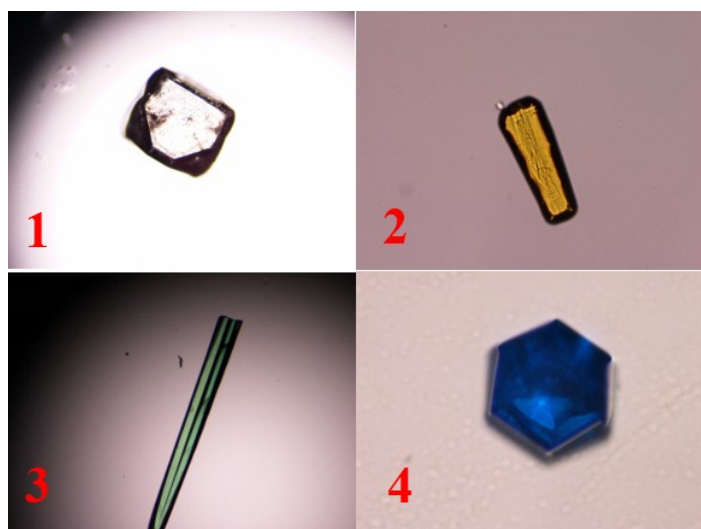

**Figure S1.** Images of the single crystals of compounds 1, 2, 3, and 4.

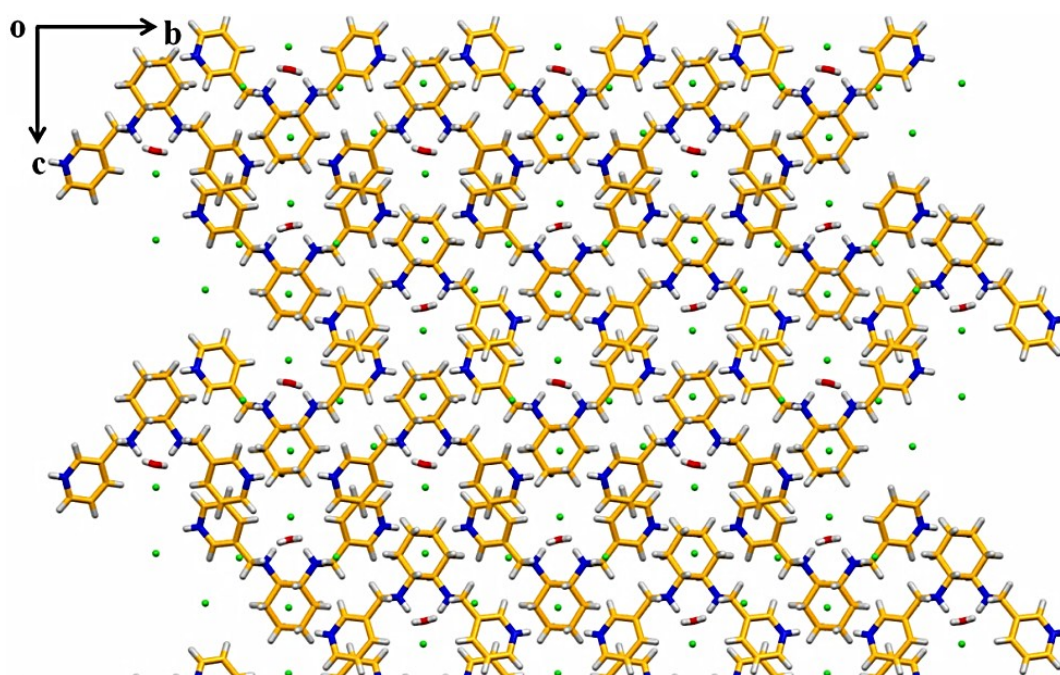

**Figure S2.** Packing of 1 viewed along the *a*-axis. Color code: carbon: orange; nitrogen: blue; oxygen: red; chloride: green; hydrogen: white.

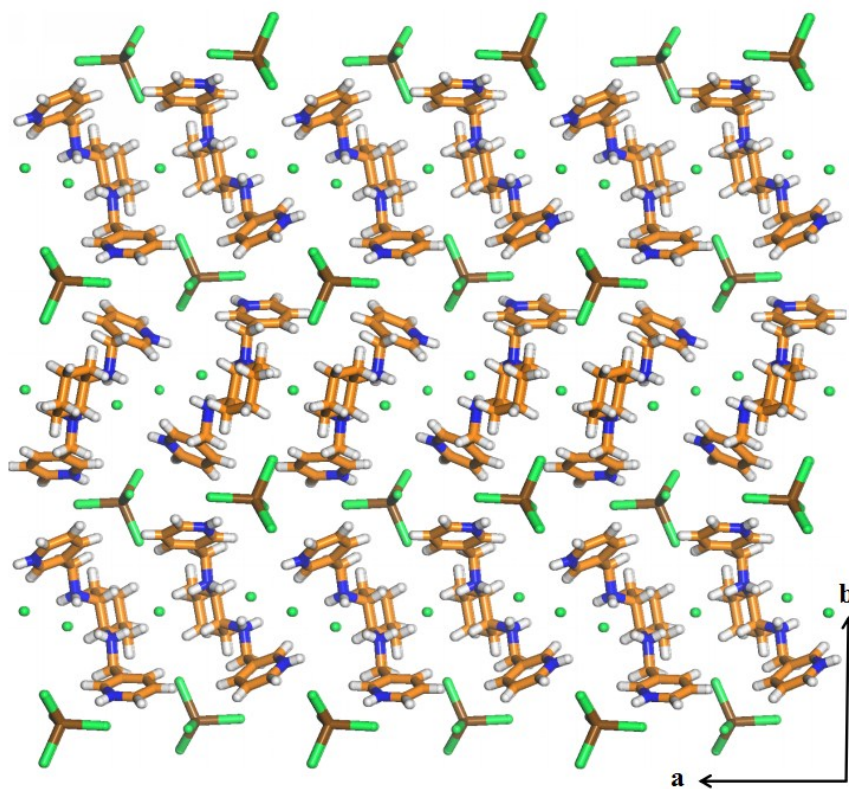

**Figure S3.** Packing of **2** viewed along the *c*-axis. Color code: carbon: orange; nitrogen: blue; chloride: green; copper: brown; hydrogen: white.

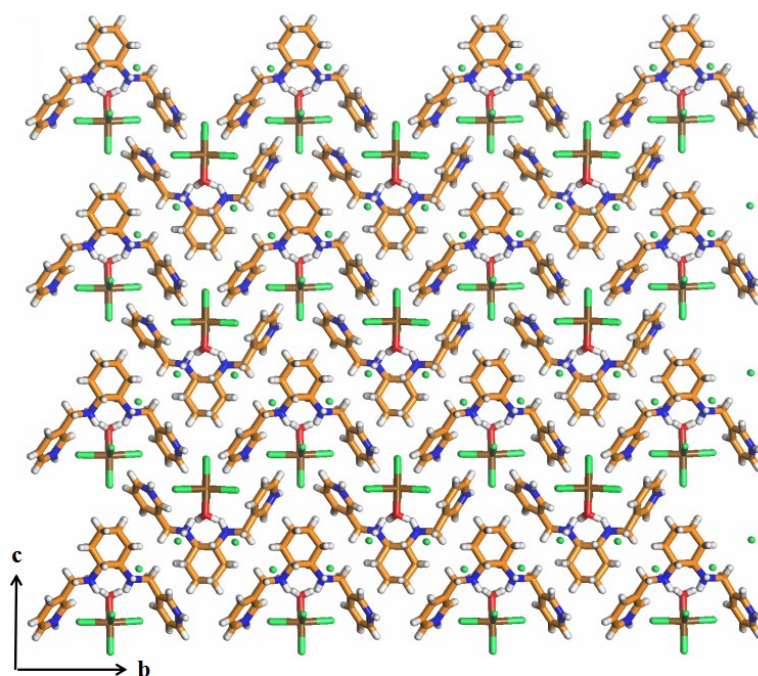

**Figure S4.** Packing of **3** viewed along the *a*-axis. Color code: carbon: orange; nitrogen: blue; oxygen: red; chloride: green; copper: brown; hydrogen: white.



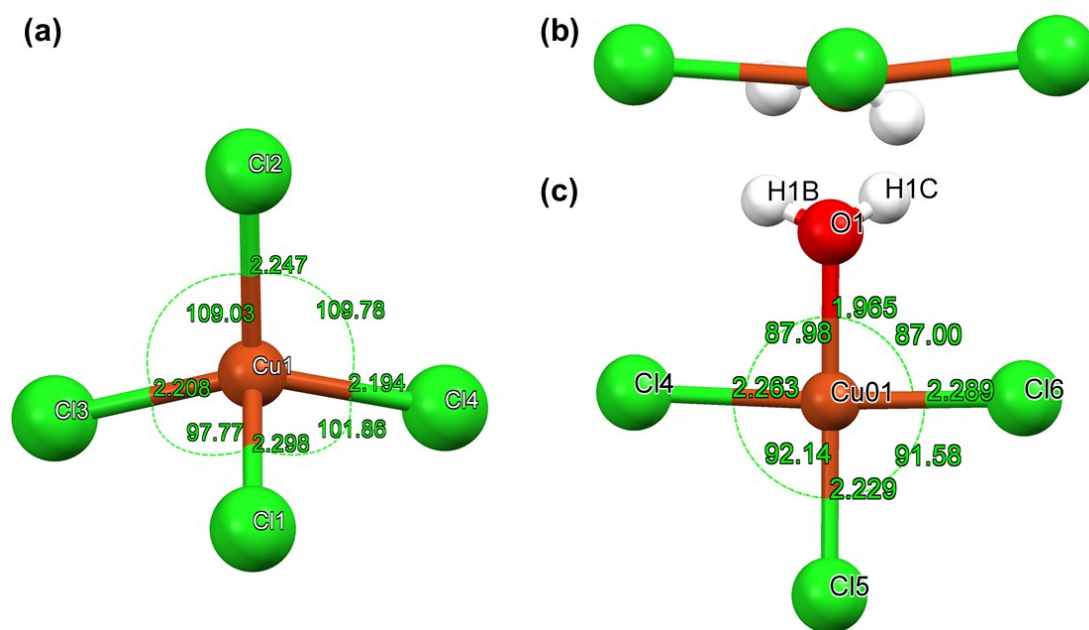

**Figure S5.** Coordination geometries around the  $[\text{CuCl}_4]^{2-}$  metal center in **2** (a). The disordered atoms in the  $[\text{CuCl}_4]^{2-}$  have not been shown for clarity purposes. View of the  $[\text{CuCl}_3(\text{H}_2\text{O})]^-$  in **3**: top (b) and side views (c).

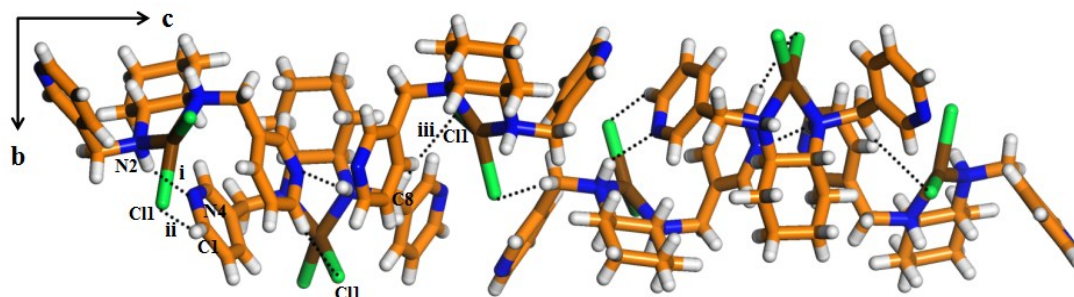

**Figure S6.** Crystal structure of **4** showing the hydrogen bond and short contacts along the  $a$ -axis. Color code: carbon: orange; nitrogen: blue; oxygen: red; chloride: green; copper: brown; hydrogen: white.

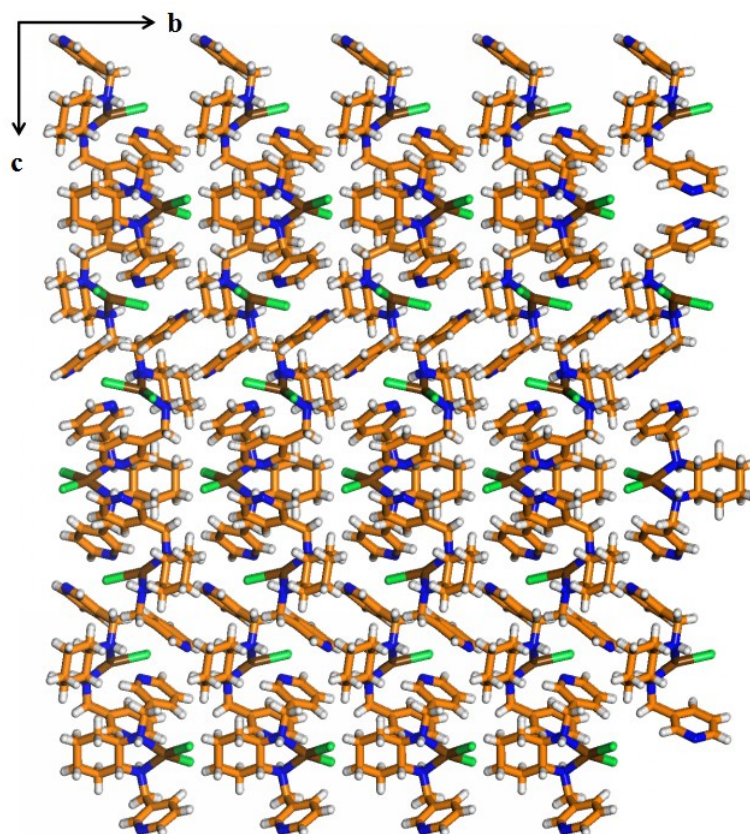

**Figure S7.** Packing of **4** viewed along the *a*-axis. Color code: carbon: orange; nitrogen: blue; oxygen: red; chloride: green; copper: brown; hydrogen: white.

**Table S1.** Hydrogen bonds in crystal **2**.

|     | D-H(Å)   | D···A(Å) | H···A(Å) | D-H···A(°) | Symmetry Code |
|-----|----------|----------|----------|------------|---------------|
| i   | 0.890(2) | 3.110(2) | 2.224(6) | 173.12(6)  | x, y, z       |
| ii  | 0.890(4) | 3.083(7) | 2.230(7) | 160.31(1)  | x, y, z       |
| iii | 0.860(4) | 3.223(2) | 2.504(1) | 141.63(2)  | x, y, z       |
| iv  | 0.890(6) | 3.050(6) | 2.165(9) | 172.15(6)  | x, y, z-1     |
| v   | 0.890(2) | 3.045(4) | 2.161(3) | 172.02(5)  | x, y, z       |

**Table S2.** Hydrogen bonds in crystal **3**.

|     | D-H(Å)   | D···A(Å) | H···A(Å) | D-H···A(°) | Symmetry Code |
|-----|----------|----------|----------|------------|---------------|
| i   | 0.889(9) | 3.142(4) | 2.323(1) | 153.06(3)  | x, y, z       |
| ii  | 0.890(6) | 3.156(3) | 2.272(8) | 171.44(0)  | x, y, z       |
| iii | 0.859(9) | 3.330(7) | 2.694(9) | 131.84(4)  | x, y, z       |
| iv  | 0.890(3) | 3.057(2) | 2.173(7) | 171.57(9)  | x, y, z       |
| v   | 0.890(4) | 3.113(0) | 2.249(5) | 163.36(2)  | x-1, y, z     |
| vi  | 0.870(3) | 3.542(3) | 2.295(9) | 148.51(4)  | x, y, z       |
| vii | 0.870(2) | 3.062(8) | 2.262(6) | 152.84(2)  | x, y, z       |

**Table S3.** Hydrogen bond and short interactions in crystal 4.

|     | D-H(Å)   | D···A(Å) | H···A(Å) | D-H···A(°) | Symmetry Code   |
|-----|----------|----------|----------|------------|-----------------|
| i   | 0.979(6) | 3.202(1) | 2.311(4) | 150.74(3)  | x-y, y, z+1/6   |
| ii  | 0.929(5) | 3.781(3) | 2.944(7) | 150.47(7)  | y, -x+y, z-1/6  |
| iii | 0.969(2) | 3.890(2) | 2.945(9) | 165.00(8)  | x-y, -y-1, -z-1 |

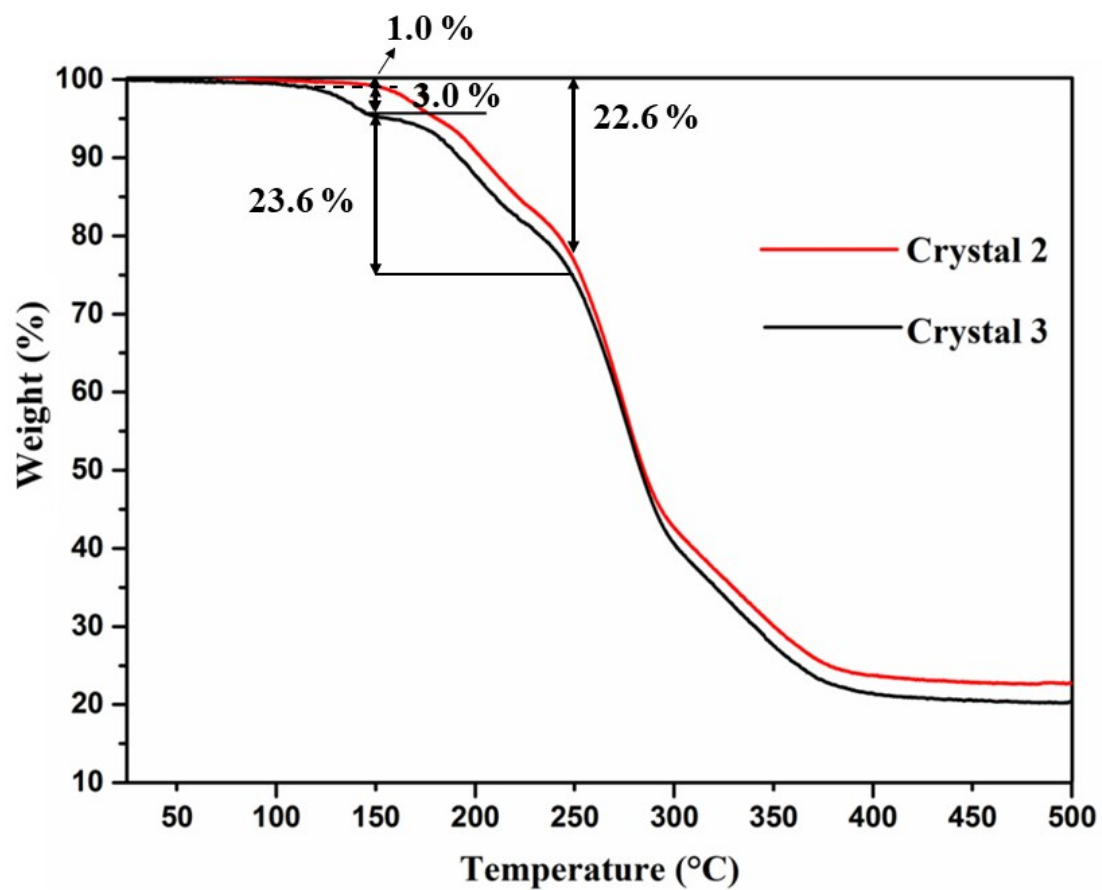**Figure S8.** TGA plot showing the weight loss in 2 and 3.

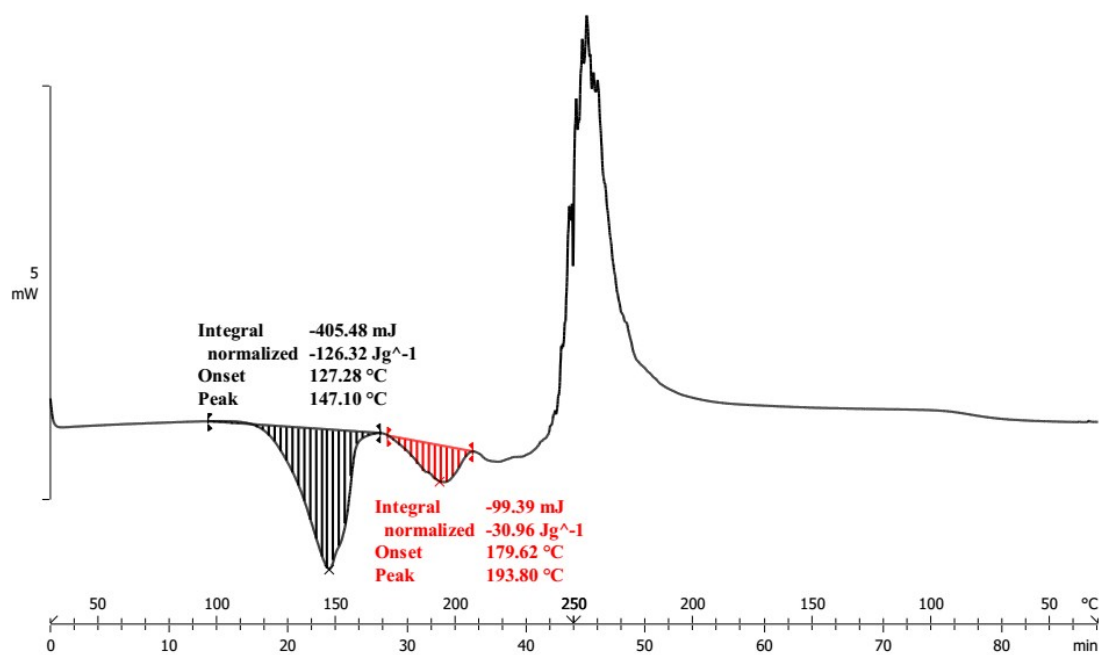

**Figure S9.** DSC corresponding to second sphere adduct **3**.

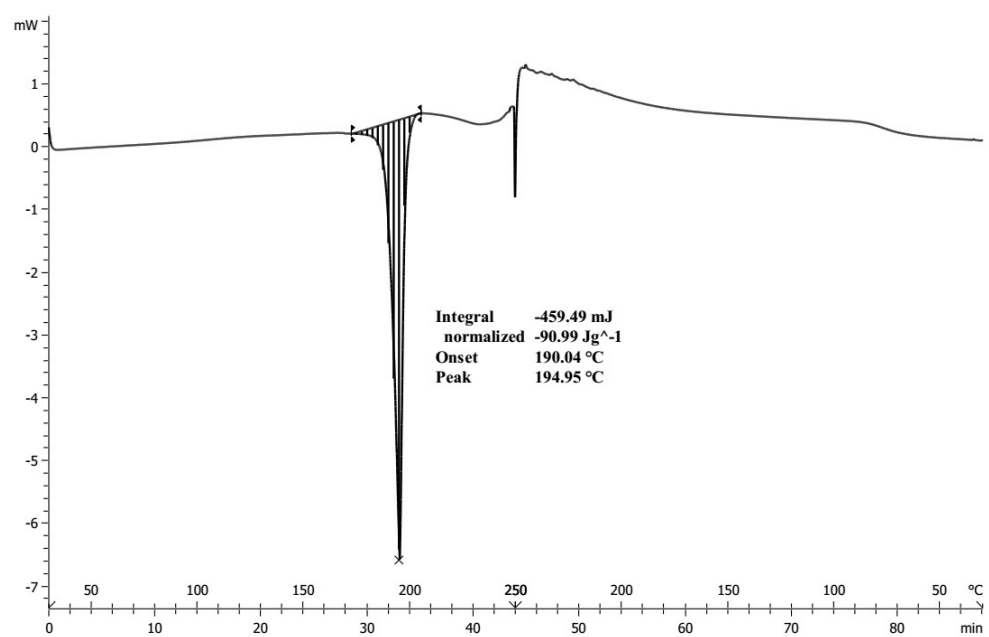

**Figure S10.** DSC corresponding to the coordination complex **4**.

**Table S4.** Low pressure nitrogen adsorption data summary for samples **3** and **4**.

| Sample   | BET (m <sup>2</sup> g <sup>-1</sup> ) | P.V. (cm <sup>3</sup> g <sup>-1</sup> ) |
|----------|---------------------------------------|-----------------------------------------|
| <b>3</b> | 7.614                                 | 0.012                                   |
| <b>4</b> | 11.250                                | 0.015                                   |

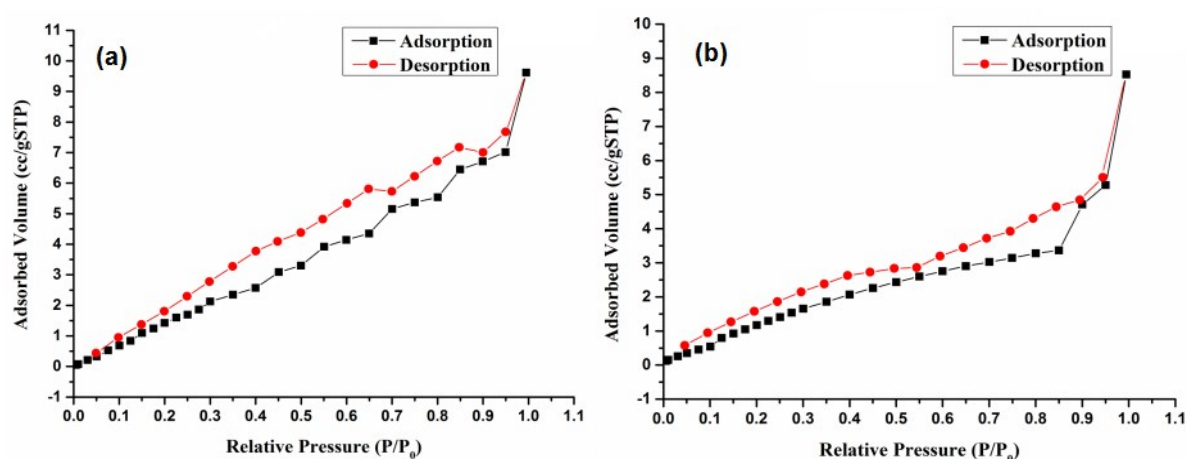

**Figure S11.** Nitrogen adsorption/desorption isotherms of the powder of **3** (a) and **4** (b).

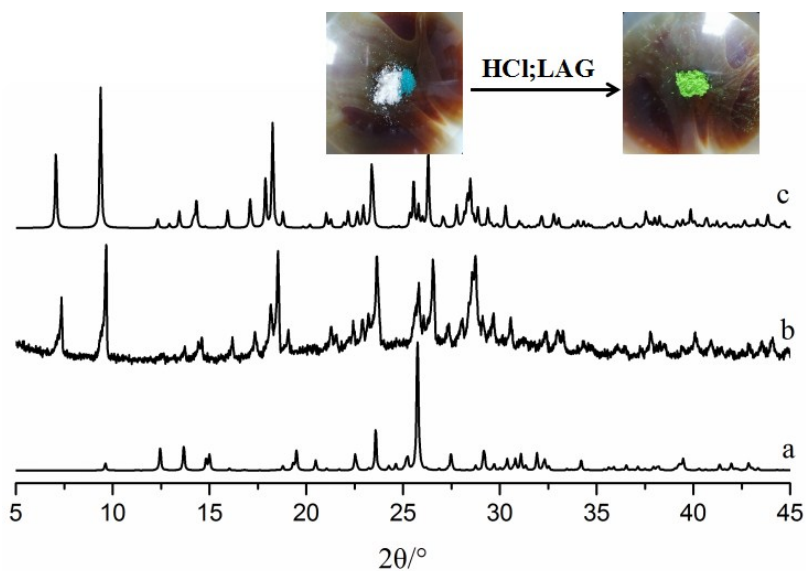

**Figure S12.** (a) Simulated XRPD from single crystal **1**. (b) The product of grinding salt of **L** and  $\text{CuCl}_2 \cdot 2\text{H}_2\text{O}$  in 1:1 ratio with a drop of concentrated HCl and a drop of methanol for 5 minutes. (c) Simulated XRPD from single crystal **3**.

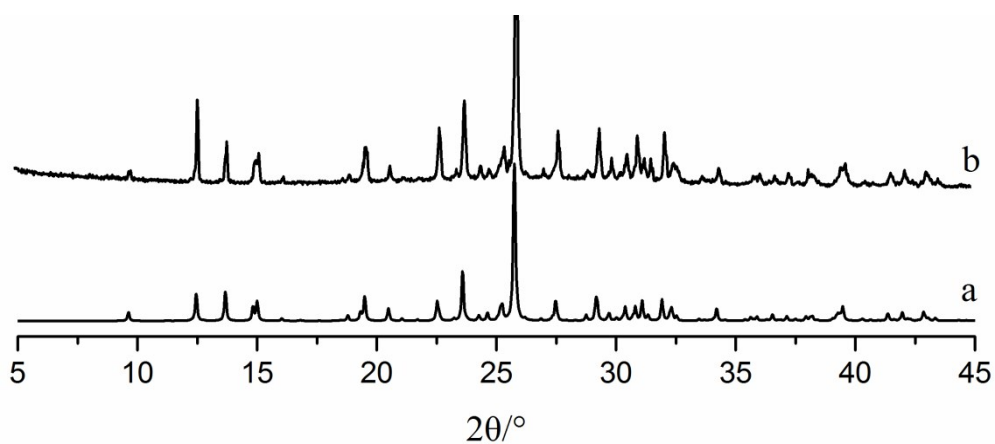

**Figure S13.** Experimental XRPD patterns of **1**: (a) Simulated XRPD from single crystal **1**; (b) Experimental XRPD from single crystal **1**.

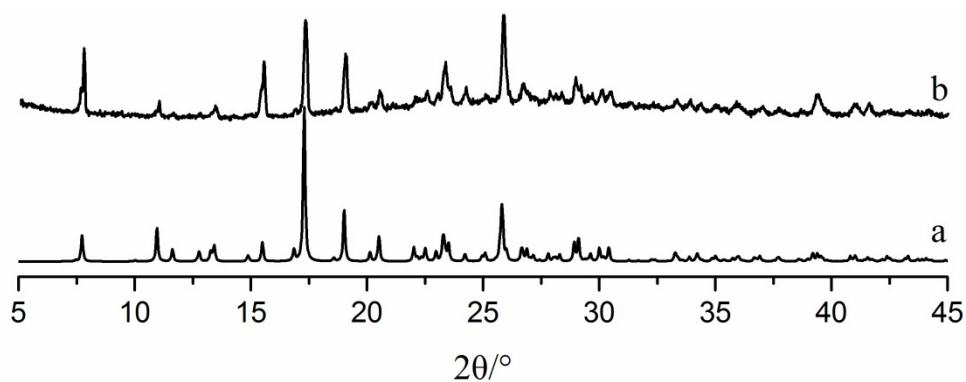

**Figure S14.** Experimental XRPD patterns of crystal **2**: (a) Simulated XRPD from single crystal **2**; (b) Experimental XRPD from single crystal **2**.

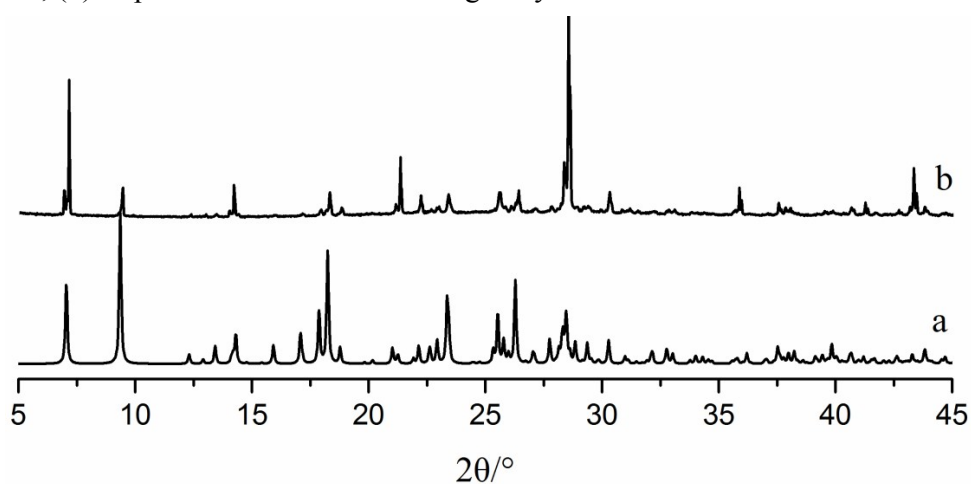

**Figure S15.** Experimental XRPD patterns of crystal **3**: (a) Simulated XRPD from single crystal **3**; (b) Experimental XRPD from single crystal **3**.

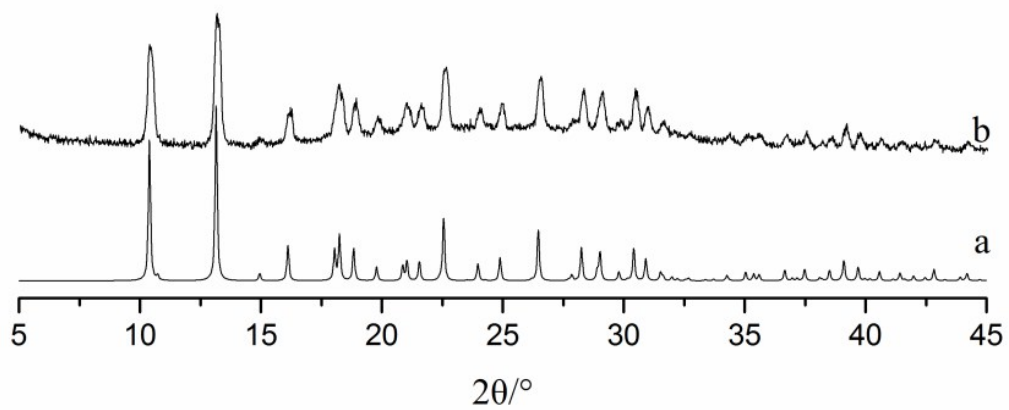

**Figure S16.** Experimental XRPD patterns of crystal **4**: (a) Simulated XRPD from single crystal **4**; (b) Experimental XRPD from single crystal **4**.

**Table S5.** Crystal data and structural refinement parameters for 1–4.

|                                          | 1                                                                | 2                                                                | 3                                                                  | 4                                                                |
|------------------------------------------|------------------------------------------------------------------|------------------------------------------------------------------|--------------------------------------------------------------------|------------------------------------------------------------------|
| Empirical formula                        | C <sub>18</sub> H <sub>30</sub> Cl <sub>4</sub> N <sub>4</sub> O | C <sub>18</sub> H <sub>28</sub> Cl <sub>6</sub> CuN <sub>4</sub> | C <sub>18</sub> H <sub>30</sub> Cl <sub>6</sub> CuN <sub>4</sub> O | C <sub>18</sub> H <sub>24</sub> Cl <sub>2</sub> CuN <sub>4</sub> |
| Formula weight                           | 460.26                                                           | 574.67                                                           | 594.71                                                             | 430.85                                                           |
| Crystal temperature (K)                  | 298                                                              | 150(2)                                                           | 298                                                                | 298                                                              |
| Crystal system                           | Orthorhombic                                                     | Orthorhombic                                                     | Monoclinic                                                         | Hexagonal                                                        |
| Space group                              | <i>P</i> 2 <sub>1</sub> 2 <sub>1</sub> 2 <sub>1</sub>            | <i>P</i> 2 <sub>1</sub> 2 <sub>1</sub> 2                         | <i>P</i> 2 <sub>1</sub>                                            | <i>P</i> 6 <sub>1</sub> 22                                       |
| Z                                        | 4                                                                | 4                                                                | 2                                                                  | 6                                                                |
| a(Å)                                     | 7.7024(11)                                                       | 13.7107(8)                                                       | 6.9923(5)                                                          | 9.8247(4)                                                        |
| b(Å)                                     | 15.716(2)                                                        | 23.0021(14)                                                      | 14.3694(10)                                                        | 9.8247(4)                                                        |
| c(Å)                                     | 18.368(3)                                                        | 7.9717(4)                                                        | 12.7878(9)                                                         | 32.973(2)                                                        |
| α(deg)                                   | 90                                                               | 90                                                               | 90                                                                 | 90                                                               |
| β(deg)                                   | 90                                                               | 90                                                               | 101.514(2)                                                         | 90                                                               |
| γ(deg)                                   | 90                                                               | 90                                                               | 90                                                                 | 120                                                              |
| V(Å <sup>3</sup> )                       | 2223.4(5)                                                        | 2514.1(2)                                                        | 1259.00(15)                                                        | 2756.3(3)                                                        |
| D <sub>x</sub> (Mg.cm <sup>-3</sup> )    | 1.375                                                            | 1.518                                                            | 1.569                                                              | 1.558                                                            |
| μ(mm <sup>-1</sup> )                     | 0.548                                                            | 1.519                                                            | 1.523                                                              | 1.488                                                            |
| F(000)                                   | 968                                                              | 1172                                                             | 610                                                                | 1338                                                             |
| R <sub>int</sub>                         | 0.0247                                                           | 0.0357                                                           | 0.0247                                                             | 0.0395                                                           |
| No. of collected data(unique)            | 28774                                                            | 11177                                                            | 21527                                                              | 51693                                                            |
| No. of data with I>2σ(I)                 | 5401                                                             | 4428                                                             | 6090                                                               | 2269                                                             |
| No. of parameters varied                 | 252                                                              | 287                                                              | 272                                                                | 115                                                              |
| s                                        | 1.120                                                            | 1.044                                                            | 1.074                                                              | 1.174                                                            |
| R <sub>f</sub> /wR <sub>f</sub>          | 0.0323/0.0789                                                    | 0.0650/0.1568                                                    | 0.0368/0.0979                                                      | 0.0322/0.0789                                                    |
| All data R <sub>f</sub> /wR <sub>f</sub> | 0.0342/0.0775                                                    | 0.0867/0.1691                                                    | 0.0377/0.0973                                                      | 0.0333/0.0783                                                    |

## Molecular Modelling Data

Solid-state density functional theory (DFT) calculations were performed by employing the GGA PBE functional.<sup>4</sup> Double zeta numerical basis sets centered on atoms have been used. In particular, double basis set with polarisation functions on heavy atoms (i.e. DND set roughly comparable with 6-31G\* gaussian contracted basis) and with polarisation functions on all atoms (i.e. DNP set roughly comparable with 6-31G\*\* gaussian contracted basis). A Pseudopotential set of parameters has been used for Cu atoms.<sup>25</sup> Explicit van der Waals corrections<sup>6</sup> were also included as these terms can be important for subtle inter and intra-particle interactions.<sup>7</sup> The efficient numerical algorithms implemented into DMol<sup>3</sup> package<sup>8</sup> were employed in all the calculations.

Fixed experimental X-ray determined unit cells were used while atomic coordinates of all atoms are free to relax assuming space group constraints. The sublimation energies have been estimated as the difference (normalised by the



number of the complex particles) between the unit cell energy and the sum of the energy of the free particles and the energy of the rest of the crystalline cell.

**Table S6** DFT energies relating to the reaction  $[\text{CuCl}_4]^{2-} + \text{H}_2\text{O} \rightarrow [\text{CuCl}_3\text{H}_2\text{O}]^- + \text{Cl}^-$ . Total energies are reported in hartree while differences both in hartree and kcal/mol.

| Method  | $[\text{CuCl}_4]^{2-}$ | $\text{H}_2\text{O}$ | $[\text{CuCl}_3\text{H}_2\text{O}]^-$ | $\text{Cl}^-$ | $\Delta\text{E}(\text{hartree})$ | kcal/mol |
|---------|------------------------|----------------------|---------------------------------------|---------------|----------------------------------|----------|
| PBE/DND | -2037.730423           | -76.3631697          | -1654.090763                          | -460.0675047  | -0.06467                         | -40.58   |
| PBE/DNP | -2037.751916           | -76.3763813          | -1654.110916                          | -460.0845112  | -0.06713                         | -42.12   |

**Table S7** Solid state DFT energies relating to crystalline structures **2** and **3**. Total energies are reported in hartree while differences both in hartree and kcal/mol.

| Method  | <b>2</b>     | $2-[\text{CuCl}_4]^{2-}$ | $[\text{CuCl}_4]^{2-}$ | $\Delta\text{E}(\text{hartree})$ | kcal/mol |
|---------|--------------|--------------------------|------------------------|----------------------------------|----------|
| PBE/DND | -15515.63197 | -7363.010011             | -2037.730423           | -0.42507                         | -266.733 |
| PBE/DNP | -15515.93645 | -7363.342621             | -2037.751916           | -0.39654                         | -248.833 |

| Method  | <b>3</b>     | $3-\text{CuCl}_3\text{H}_2\text{O}$ | $[\text{CuCl}_3\text{H}_2\text{O}]^-$ | $\Delta\text{E}(\text{hartree})$ | kcal/mol |
|---------|--------------|-------------------------------------|---------------------------------------|----------------------------------|----------|
| PBE/DND | -7910.606574 | -4601.912687                        | -1654.090763                          | -0.25618                         | -160.756 |
| PBE/DNP | -7910.775216 | -4602.093054                        | -1654.110916                          | -0.23017                         | -144.431 |

**Geometrical parameters of structures 2 and 3 optimised at the PBE/DNP level are listed in pdb format.**

## Structure 2

REMARK 2 PDB file

REMARK Created: Sat Apr 06 17:55:07 ora solare Europa occidentale 2019

CRYST1 13.850 22.857 8.068 90.00 90.00 90.00 P21212

ORIGX1 1.000000 0.000000 0.000000 0.000000

ORIGX2 0.000000 1.000000 0.000000 0.000000

ORIGX3 0.000000 0.000000 1.000000 0.000000

SCALE1 0.072205 0.000000 0.000000 0.000000

SCALE2 0.000000 0.043750 0.000000 0.000000

SCALE3 0.000000 0.000000 0.123954 0.000000

|      |    |     |     |   |       |        |       |      |      |      |
|------|----|-----|-----|---|-------|--------|-------|------|------|------|
| ATOM | 1  | Cu1 | MOL | 2 | 4.876 | 5.813  | 8.027 | 1.00 | 0.06 | Cu2+ |
| ATOM | 2  | Cl1 | MOL | 2 | 5.294 | 5.121  | 5.831 | 0.70 | 0.09 | Cl1- |
| ATOM | 3  | Cl2 | MOL | 2 | 2.580 | 6.070  | 8.257 | 1.00 | 0.07 | Cl1- |
| ATOM | 4  | Cl3 | MOL | 2 | 5.749 | 7.917  | 8.061 | 1.00 | 0.08 | Cl1- |
| ATOM | 5  | Cl4 | MOL | 2 | 5.622 | 4.295  | 9.531 | 0.70 | 0.19 | Cl1- |
| ATOM | 6  | Cl7 | MOL | 2 | 4.636 | 0.858  | 3.543 | 1.00 | 0.06 | Cl1- |
| ATOM | 7  | N1  | MOL | 2 | 4.328 | -0.782 | 0.896 | 1.00 | 0.06 | N1+  |
| ATOM | 8  | H1A | MOL | 2 | 4.323 | -0.292 | 1.833 | 1.00 | 0.07 | H    |
| ATOM | 9  | H1B | MOL | 2 | 5.211 | -0.427 | 0.397 | 1.00 | 0.07 | H    |
| ATOM | 10 | N2  | MOL | 2 | 2.430 | 1.563  | 1.428 | 1.00 | 0.04 | N1+  |
| ATOM | 11 | H2A | MOL | 2 | 3.207 | 1.398  | 2.128 | 1.00 | 0.05 | H    |
| ATOM | 12 | H2B | MOL | 2 | 1.591 | 0.995  | 1.772 | 1.00 | 0.05 | H    |
| ATOM | 13 | N3  | MOL | 2 | 2.453 | 4.476  | 4.901 | 1.00 | 0.08 | N    |
| ATOM | 14 | H3  | MOL | 2 | 3.278 | 4.815  | 5.468 | 1.00 | 0.09 | H    |
| ATOM | 15 | N4  | MOL | 2 | 6.596 | -2.444 | 4.196 | 1.00 | 0.09 | N    |
| ATOM | 16 | H4  | MOL | 2 | 7.538 | -2.062 | 4.444 | 1.00 | 0.11 | H    |
| ATOM | 17 | C1  | MOL | 2 | 3.115 | -0.437 | 0.058 | 1.00 | 0.04 | C    |

|      |    |      |     |   |        |        |        |      |      |   |
|------|----|------|-----|---|--------|--------|--------|------|------|---|
| ATOM | 18 | H1   | MOL | 2 | 2.262  | -0.961 | 0.523  | 1.00 | 0.05 | H |
| ATOM | 19 | C2   | MOL | 2 | 2.814  | 1.073  | 0.043  | 1.00 | 0.04 | C |
| ATOM | 20 | H2   | MOL | 2 | 3.710  | 1.647  | -0.258 | 1.00 | 0.05 | H |
| ATOM | 21 | C3   | MOL | 2 | 2.075  | 3.024  | 1.474  | 1.00 | 0.05 | C |
| ATOM | 22 | H3A  | MOL | 2 | 2.929  | 3.583  | 1.072  | 1.00 | 0.07 | H |
| ATOM | 23 | H3B  | MOL | 2 | 1.200  | 3.187  | 0.837  | 1.00 | 0.07 | H |
| ATOM | 24 | C4   | MOL | 2 | 1.748  | 3.497  | 2.862  | 1.00 | 0.05 | C |
| ATOM | 25 | C5   | MOL | 2 | 2.757  | 3.985  | 3.684  | 1.00 | 0.07 | C |
| ATOM | 26 | H5   | MOL | 2 | 3.809  | 4.017  | 3.388  | 1.00 | 0.08 | H |
| ATOM | 27 | C6   | MOL | 2 | 1.194  | 4.543  | 5.383  | 1.00 | 0.08 | C |
| ATOM | 28 | H6   | MOL | 2 | 1.073  | 4.995  | 6.370  | 1.00 | 0.09 | H |
| ATOM | 29 | C7   | MOL | 2 | 0.151  | 4.064  | 4.604  | 1.00 | 0.10 | C |
| ATOM | 30 | H7   | MOL | 2 | -0.865 | 4.129  | 4.993  | 1.00 | 0.12 | H |
| ATOM | 31 | C8   | MOL | 2 | 0.428  | 3.537  | 3.340  | 1.00 | 0.07 | C |
| ATOM | 32 | H8   | MOL | 2 | -0.379 | 3.182  | 2.696  | 1.00 | 0.09 | H |
| ATOM | 33 | C9   | MOL | 2 | 1.641  | 1.350  | -0.914 | 1.00 | 0.05 | C |
| ATOM | 34 | H9A  | MOL | 2 | 1.479  | 2.433  | -0.986 | 1.00 | 0.07 | H |
| ATOM | 35 | H9B  | MOL | 2 | 0.725  | 0.926  | -0.465 | 1.00 | 0.07 | H |
| ATOM | 36 | C10  | MOL | 2 | 1.848  | 0.787  | -2.316 | 1.00 | 0.06 | C |
| ATOM | 37 | AH10 | MOL | 2 | 0.947  | 0.978  | -2.920 | 1.00 | 0.07 | H |
| ATOM | 38 | BH10 | MOL | 2 | 2.682  | 1.309  | -2.816 | 1.00 | 0.07 | H |
| ATOM | 39 | C11  | MOL | 2 | 2.155  | -0.705 | -2.281 | 1.00 | 0.05 | C |
| ATOM | 40 | AH11 | MOL | 2 | 2.389  | -1.064 | -3.296 | 1.00 | 0.06 | H |
| ATOM | 41 | BH11 | MOL | 2 | 1.280  | -1.279 | -1.929 | 1.00 | 0.06 | H |
| ATOM | 42 | C12  | MOL | 2 | 3.341  | -0.981 | -1.361 | 1.00 | 0.05 | C |
| ATOM | 43 | AH12 | MOL | 2 | 3.506  | -2.067 | -1.293 | 1.00 | 0.06 | H |
| ATOM | 44 | BH12 | MOL | 2 | 4.255  | -0.526 | -1.785 | 1.00 | 0.06 | H |
| ATOM | 45 | C13  | MOL | 2 | 4.476  | -2.273 | 1.117  | 1.00 | 0.10 | C |
| ATOM | 46 | AH13 | MOL | 2 | 3.503  | -2.744 | 0.923  | 1.00 | 0.12 | H |
| ATOM | 47 | BH13 | MOL | 2 | 5.190  | -2.657 | 0.377  | 1.00 | 0.12 | H |

|      |    |         |   |       |        |       |      |      |     |
|------|----|---------|---|-------|--------|-------|------|------|-----|
| ATOM | 48 | C14 MOL | 2 | 4.943 | -2.604 | 2.505 | 1.00 | 0.05 | C   |
| ATOM | 49 | C15 MOL | 2 | 6.178 | -2.147 | 2.955 | 1.00 | 0.07 | C   |
| ATOM | 50 | H15 MOL | 2 | 6.874 | -1.553 | 2.361 | 1.00 | 0.08 | H   |
| ATOM | 51 | C16 MOL | 2 | 5.883 | -3.195 | 5.062 | 1.00 | 0.11 | C   |
| ATOM | 52 | H16 MOL | 2 | 6.335 | -3.389 | 6.035 | 1.00 | 0.14 | H   |
| ATOM | 53 | C17 MOL | 2 | 4.657 | -3.701 | 4.656 | 1.00 | 0.10 | C   |
| ATOM | 54 | H17 MOL | 2 | 4.095 | -4.325 | 5.355 | 1.00 | 0.12 | H   |
| ATOM | 55 | C18 MOL | 2 | 4.182 | -3.394 | 3.374 | 1.00 | 0.09 | C   |
| ATOM | 56 | H18 MOL | 2 | 3.218 | -3.790 | 3.038 | 1.00 | 0.11 | H   |
| ATOM | 57 | Cl5 MOL | 2 | 6.925 | 0.000  | 7.533 | 1.00 | 0.24 | Cl- |
| ATOM | 58 | Cl6 MOL | 2 | 0.000 | 0.000  | 2.455 | 1.00 | 0.07 | Cl- |

TER 59

CONNECT 2 3 4 5 6

CONNECT 3 2

CONNECT 4 2

CONNECT 5 2

CONNECT 6 2

CONNECT 8 9 10 18 46

CONNECT 9 8

CONNECT 10 8

CONNECT 11 12 13 20 22

CONNECT 12 11

CONNECT 13 11

CONNECT 14 15 26 28

CONNECT 15 14

CONNECT 16 17 50 52

CONNECT 17 16

CONNECT 18 8 19 20 43

CONNECT 19 18

CONNECT 20 11 18 21 34

CONNECT 21 20  
CONNECT 22 11 23 24 25  
CONNECT 23 22  
CONNECT 24 22  
CONNECT 25 22 26 32  
CONNECT 26 14 25 27  
CONNECT 27 26  
CONNECT 28 14 29 30  
CONNECT 29 28  
CONNECT 30 28 31 32  
CONNECT 31 30  
CONNECT 32 25 30 33  
CONNECT 33 32  
CONNECT 34 20 35 36 37  
CONNECT 35 34  
CONNECT 36 34  
CONNECT 37 34 38 39 40  
CONNECT 38 37  
CONNECT 39 37  
CONNECT 40 37 41 42 43  
CONNECT 41 40  
CONNECT 42 40  
CONNECT 43 18 40 44 45  
CONNECT 44 43  
CONNECT 45 43  
CONNECT 46 8 47 48 49  
CONNECT 47 46  
CONNECT 48 46  
CONNECT 49 46 50 56  
CONNECT 50 16 49 51

CONECT 51 50  
 CONECT 52 16 53 54  
 CONECT 53 52  
 CONECT 54 52 55 56  
 CONECT 55 54  
 CONECT 56 49 54 57  
 CONECT 57 56  
 END

### Structure 3

REMARK 3 PDB file

REMARK Created: Sat Apr 06 17:54:28 ora solare Europa occidentale 2019

CRYST1 6.992 14.369 12.788 90.00 101.51 90.00 P21

ORIGX1 1.000000 0.000000 0.000000 0.000000

ORIGX2 0.000000 1.000000 0.000000 0.000000

ORIGX3 0.000000 0.000000 1.000000 0.000000

SCALE1 0.143014 0.000000 0.029133 0.000000

SCALE2 0.000000 0.069592 0.000000 0.000000

SCALE3 0.000000 0.000000 0.079806 0.000000

|      |    |      |     |   |       |       |        |      |      |      |
|------|----|------|-----|---|-------|-------|--------|------|------|------|
| ATOM | 1  | Cu01 | MOL | 2 | 4.711 | 7.229 | 11.262 | 1.00 | 0.03 | Cu2+ |
| ATOM | 2  | Cl3  | MOL | 2 | 3.941 | 5.178 | 7.298  | 1.00 | 0.04 | Cl1- |
| ATOM | 3  | Cl6  | MOL | 2 | 4.717 | 4.946 | 11.160 | 1.00 | 0.04 | Cl1- |
| ATOM | 4  | Cl2  | MOL | 2 | 1.631 | 7.410 | 10.607 | 1.00 | 0.04 | Cl1- |
| ATOM | 5  | Cl5  | MOL | 2 | 4.715 | 7.119 | 13.573 | 1.00 | 0.04 | Cl1- |
| ATOM | 6  | Cl4  | MOL | 2 | 4.927 | 9.498 | 11.309 | 1.00 | 0.04 | Cl1- |
| ATOM | 7  | Cl1  | MOL | 2 | 4.737 | 9.494 | 7.230  | 1.00 | 0.05 | Cl1- |
| ATOM | 8  | O1   | MOL | 2 | 5.076 | 7.242 | 9.255  | 1.00 | 0.03 | O    |
| ATOM | 9  | H1B  | MOL | 2 | 4.773 | 8.075 | 8.782  | 1.00 | 0.05 | H    |
| ATOM | 10 | H1C  | MOL | 2 | 4.614 | 6.495 | 8.765  | 1.00 | 0.05 | H    |

|      |    |      |     |   |        |        |        |      |      |     |
|------|----|------|-----|---|--------|--------|--------|------|------|-----|
| ATOM | 11 | N4   | MOL | 2 | 1.018  | 5.755  | 8.067  | 1.00 | 0.02 | N1+ |
| ATOM | 12 | H4A  | MOL | 2 | 2.053  | 5.565  | 7.875  | 1.00 | 0.03 | H   |
| ATOM | 13 | H4B  | MOL | 2 | 0.993  | 6.276  | 8.993  | 1.00 | 0.03 | H   |
| ATOM | 14 | N3   | MOL | 2 | 0.700  | 8.871  | 8.030  | 1.00 | 0.02 | N1+ |
| ATOM | 15 | H3A  | MOL | 2 | -0.341 | 8.990  | 7.860  | 1.00 | 0.03 | H   |
| ATOM | 16 | H3B  | MOL | 2 | 0.856  | 8.414  | 8.977  | 1.00 | 0.03 | H   |
| ATOM | 17 | N1   | MOL | 2 | 2.114  | 2.958  | 11.129 | 1.00 | 0.03 | N   |
| ATOM | 18 | H1   | MOL | 2 | 3.024  | 3.060  | 11.628 | 1.00 | 0.04 | H   |
| ATOM | 19 | C7   | MOL | 2 | 0.539  | 6.626  | 6.915  | 1.00 | 0.02 | C   |
| ATOM | 20 | H7   | MOL | 2 | -0.540 | 6.789  | 7.063  | 1.00 | 0.03 | H   |
| ATOM | 21 | C14  | MOL | 2 | 0.965  | 10.992 | 9.341  | 1.00 | 0.02 | C   |
| ATOM | 22 | C12  | MOL | 2 | 1.281  | 7.985  | 6.937  | 1.00 | 0.02 | C   |
| ATOM | 23 | H12  | MOL | 2 | 2.342  | 7.831  | 7.202  | 1.00 | 0.03 | H   |
| ATOM | 24 | C4   | MOL | 2 | 0.644  | 3.652  | 9.402  | 1.00 | 0.02 | C   |
| ATOM | 25 | C5   | MOL | 2 | 1.870  | 3.735  | 10.051 | 1.00 | 0.03 | C   |
| ATOM | 26 | H5   | MOL | 2 | 2.691  | 4.395  | 9.766  | 1.00 | 0.03 | H   |
| ATOM | 27 | C15  | MOL | 2 | 1.886  | 11.055 | 10.398 | 1.00 | 0.04 | C   |
| ATOM | 28 | H15  | MOL | 2 | 2.834  | 10.509 | 10.336 | 1.00 | 0.05 | H   |
| ATOM | 29 | C8   | MOL | 2 | 0.775  | 5.831  | 5.622  | 1.00 | 0.04 | C   |
| ATOM | 30 | H8A  | MOL | 2 | 1.801  | 5.428  | 5.652  | 1.00 | 0.05 | H   |
| ATOM | 31 | H8B  | MOL | 2 | 0.089  | 4.972  | 5.597  | 1.00 | 0.05 | H   |
| ATOM | 32 | C13  | MOL | 2 | 1.307  | 10.250 | 8.077  | 1.00 | 0.03 | C   |
| ATOM | 33 | AH13 | MOL | 2 | 0.942  | 10.804 | 7.200  | 1.00 | 0.04 | H   |
| ATOM | 34 | BH13 | MOL | 2 | 2.398  | 10.127 | 7.998  | 1.00 | 0.04 | H   |
| ATOM | 35 | C1   | MOL | 2 | 1.222  | 2.084  | 11.636 | 1.00 | 0.04 | C   |
| ATOM | 36 | H1A  | MOL | 2 | 1.510  | 1.545  | 12.540 | 1.00 | 0.05 | H   |
| ATOM | 37 | C16  | MOL | 2 | 1.606  | 11.809 | 11.538 | 1.00 | 0.04 | C   |
| ATOM | 38 | H16  | MOL | 2 | 2.331  | 11.883 | 12.353 | 1.00 | 0.05 | H   |
| ATOM | 39 | C18  | MOL | 2 | -0.240 | 11.680 | 9.479  | 1.00 | 0.04 | C   |
| ATOM | 40 | H18  | MOL | 2 | -1.025 | 11.655 | 8.723  | 1.00 | 0.05 | H   |

|      |    |      |     |   |        |        |        |      |      |   |
|------|----|------|-----|---|--------|--------|--------|------|------|---|
| ATOM | 41 | C3   | MOL | 2 | -0.299 | 2.735  | 9.902  | 1.00 | 0.04 | C |
| ATOM | 42 | H3   | MOL | 2 | -1.274 | 2.650  | 9.416  | 1.00 | 0.05 | H |
| ATOM | 43 | C6   | MOL | 2 | 0.286  | 4.458  | 8.188  | 1.00 | 0.03 | C |
| ATOM | 44 | H6A  | MOL | 2 | 0.483  | 3.855  | 7.287  | 1.00 | 0.04 | H |
| ATOM | 45 | H6B  | MOL | 2 | -0.792 | 4.675  | 8.190  | 1.00 | 0.04 | H |
| ATOM | 46 | C10  | MOL | 2 | 1.557  | 7.861  | 4.400  | 1.00 | 0.06 | C |
| ATOM | 47 | AH10 | MOL | 2 | 1.464  | 8.453  | 3.477  | 1.00 | 0.07 | H |
| ATOM | 48 | BH10 | MOL | 2 | 2.609  | 7.526  | 4.465  | 1.00 | 0.07 | H |
| ATOM | 49 | C11  | MOL | 2 | 1.206  | 8.735  | 5.598  | 1.00 | 0.04 | C |
| ATOM | 50 | AH11 | MOL | 2 | 1.893  | 9.592  | 5.638  | 1.00 | 0.05 | H |
| ATOM | 51 | BH11 | MOL | 2 | 0.190  | 9.147  | 5.467  | 1.00 | 0.05 | H |
| ATOM | 52 | C2   | MOL | 2 | -0.010 | 1.954  | 11.018 | 1.00 | 0.05 | C |
| ATOM | 53 | H2   | MOL | 2 | -0.762 | 1.284  | 11.439 | 1.00 | 0.06 | H |
| ATOM | 54 | N2   | MOL | 2 | -0.480 | 12.393 | 10.599 | 1.00 | 0.08 | N |
| ATOM | 55 | H2A  | MOL | 2 | -1.392 | 12.902 | 10.738 | 1.00 | 0.10 | H |
| ATOM | 56 | C9   | MOL | 2 | 0.627  | 6.657  | 4.353  | 1.00 | 0.05 | C |
| ATOM | 57 | H9A  | MOL | 2 | -0.418 | 7.003  | 4.234  | 1.00 | 0.06 | H |
| ATOM | 58 | H9B  | MOL | 2 | 0.858  | 6.023  | 3.483  | 1.00 | 0.06 | H |
| ATOM | 59 | C17  | MOL | 2 | 0.400  | 12.484 | 11.619 | 1.00 | 0.07 | C |
| ATOM | 60 | H17  | MOL | 2 | 0.103  | 13.101 | 12.474 | 1.00 | 0.08 | H |

TER 61

CONNECT 1 60

CONNECT 2 4 6 7 9

CONNECT 4 2

CONNECT 6 2

CONNECT 7 2

CONNECT 9 2 10 11

CONNECT 10 9

CONNECT 11 9

CONNECT 12 13 14 20 44



CONNECT 13 12  
CONNECT 14 12  
CONNECT 15 16 17 23 33  
CONNECT 16 15  
CONNECT 17 15  
CONNECT 18 19 26 36  
CONNECT 19 18  
CONNECT 20 12 21 23 30  
CONNECT 21 20  
CONNECT 22 28 33 40  
CONNECT 23 15 20 24 50  
CONNECT 24 23  
CONNECT 25 26 42 44  
CONNECT 26 18 25 27  
CONNECT 27 26  
CONNECT 28 22 29 38  
CONNECT 29 28  
CONNECT 30 20 31 32 57  
CONNECT 31 30  
CONNECT 32 30  
CONNECT 33 15 22 34 35  
CONNECT 34 33  
CONNECT 35 33  
CONNECT 36 18 37 53  
CONNECT 37 36  
CONNECT 38 28 39 60  
CONNECT 39 38  
CONNECT 40 22 41 55  
CONNECT 41 40  
CONNECT 42 25 43 53

CONNECT 43 42  
CONNECT 44 12 25 45 46  
CONNECT 45 44  
CONNECT 46 44  
CONNECT 47 48 49 50 57  
CONNECT 48 47  
CONNECT 49 47  
CONNECT 50 23 47 51 52  
CONNECT 51 50  
CONNECT 52 50  
CONNECT 53 36 42 54  
CONNECT 54 53  
CONNECT 55 40 56 60  
CONNECT 56 55  
CONNECT 57 30 47 58 59  
CONNECT 58 57  
CONNECT 59 57  
CONNECT 60 38 55 1  
END

## References

---

- 1 Sheldrick, G. M. *SHELXTL Reference Manual* (Siemens Analytical X-ray Systems, Inc., Madison, Wisconsin, USA), **1996**.
- 2 Sheldrick, G. M. *Acta Cryst.* **2008**, *A64*, 112–122.
- 3 Cooper, C. J.; Jones, M. D.; Brayshaw, S. K.; Sonnex, B.; Russell, M. L.; Mahon M. F.; Allan, D. R. When is an imine not an imine? Unusual reactivity of a series of Cu(II) imine-pyridine complexes and their exploitation for the Henry reaction. *Dalton Trans.* **2011**, *40*, 3677–3682.
- 4 (a) Perdew, J. P.; Burke K.; Ernzerhof, M. E. Generalized Gradient

---

Approximation Made Simple. *Phys. Rev. Lett.* **1996**, *77*, 3865–3868. (b) Perdew, J. P.; Burke K.; Ernzerhof, M. E. Generalized Gradient Approximation Made Simple. *Phys. Rev. Lett.* **1997**, *78*, 1396–1396.

5 (a) Dolg, M.; Wedig, U.; Stoll, H.; Preuss, H. Energy-adjusted ab initio pseudopotentials for the first row transition elements. *J. Chem. Phys.* 1987, *86*, 866–872. (b) Bergner, A.; Dolg, M.; Küechle, W.; Stoll, H.; Preuss, H. Ab initio energy-adjusted pseudopotentials for elements of groups 13–17. *Mol. Phys.* **1993**, *80*, 1431–1441.

6 Grimme, S. Semiempirical hybrid density functional with perturbative second-order correlation. *J. Chem. Phys.* **2006**, *124*, 34108.

7 (a) Baggioli, A.; Meille, S. V.; Raos, G.; Po, R.; Brinkmann M.; Famulari, A. Intramolecular CH/ $\pi$  interactions in alkylaromatics: Monomer conformations for poly(3-alkylthiophene) atomistic models. *Int. J. Quantum Chem.* **2013**, *113*, 2154–2162. (b) Baggioli A.; Famulari, A. On the inter-ring torsion potential of regioregular P3HT: a first principles reexamination with explicit side chains. *Phys. Chem. Chem. Phys.* **2014**, *16*, 3983–3994.

8 Delley, B. From molecules to solids with the DMol<sup>3</sup> approach. *J. Chem. Phys.* **2000**, *113*, 7756–7764.
